# Supplementary material
Source: publisher figshare collection journal article supplement (https://acs.figshare.com/ndownloader/files/18209171)
Supplement: Supplementary file 1 [file 18209171]

## **Supporting Information**

Mass transfer characteristics and optimization of hydrophilic ceramic membrane  
contactor for SO<sub>2</sub> absorption

Xiangli Kong, Minghui Qiu, Kaiyun Fu, Xingyin Gao, Peng Xu, Dawei Gong, Xianfu Chen and Yiqun

Fan\*

State Key Laboratory of Materials-Oriented Chemical Engineering, College of  
Chemical

Engineering, Nanjing Tech University, No.30 South Puzhu Road, Nanjing 211800,

P.R. China

\* Corresponding author: Tel.: +86 25 83172277; Fax: +86 25 83172292.

E-mail: [yiqunfan@njtech.edu.cn](mailto:yiqunfan@njtech.edu.cn)

## 1 Mass transfer model

### 1.1 Shell

The mass transfer of SO<sub>2</sub> in the gas phase without reaction follows Fick's law, so its continuum equation is:

$$D_{\text{SO}_2\text{-Gas}} \left[ \frac{\partial^2 c_{\text{SO}_2\text{-Shell}}}{\partial r^2} + \frac{1}{r} \frac{\partial c_{\text{SO}_2\text{-Shell}}}{\partial r} + \frac{\partial^2 c_{\text{SO}_2\text{-Shell}}}{\partial z^2} \right] - U_{\text{Shell}} \frac{\partial c_{\text{SO}_2\text{-Shell}}}{\partial z} = 0 \quad (1)$$

where  $D_{\text{SO}_2\text{-Gas}}$  is the diffusion coefficient of SO<sub>2</sub> in the SO<sub>2</sub>/N<sub>2</sub> mixture,  $1.23 \times 10^{-5} \text{ m}^2 \cdot \text{s}^{-1}$  at 293.15 K and 1 atm, and  $U_{\text{Shell}}$  is the gas axial flow rate,  $\text{m} \cdot \text{s}^{-1}$ .

Since the gas flow was assumed to be laminar in a concentric tube, the axial gas flow velocity distribution can be calculated as follows:

$$U_{\text{Shell}}(r) = -\frac{8U_{\text{ave-Shell}}}{(r_{\text{shell}} - r_{\text{out}})^2} (r - r_{\text{out}})(r - r_{\text{shell}}) \quad (2)$$

where  $r_{\text{out}}$  is the outer radius of the ceramic membrane tube, m;  $r_{\text{shell}}$  is the inner radius of the membrane module, m; and  $U_{\text{ave-shell}}$  is the average flow velocity of the gas at the shell side,  $\text{m} \cdot \text{s}^{-1}$ , and can be calculated as follows:

$$U_{\text{ave-shell}} = \frac{Q_G}{\pi(r_{\text{shell}}^2 - r_{\text{out}}^2)} \quad (3)$$

where  $Q_G$  is the gas volume flow,  $\text{m}^3 \cdot \text{s}^{-1}$ .

The boundary conditions of the mass transfer equation are presented as follows:

$$r = r_{\text{shell}}, \quad \frac{\partial c_{\text{SO}_2\text{-Shell}}}{\partial r} = 0 \quad (4a)$$

$$r = r_{\text{out}}, \quad c_{\text{SO}_2\text{-Shell}} = c_{\text{SO}_2\text{-Membrane}} / m \quad (4b)$$

$$z = L, \quad c_{\text{SO}_2\text{-Shell}} = c_0 \quad (4c)$$

where  $c_0$  is the SO<sub>2</sub> concentration at the inlet,  $\text{mol} \cdot \text{m}^{-3}$ ;  $c_{\text{SO}_2\text{-Support}}$  is the SO<sub>2</sub>

concentration at the pore entrance from the macroporous support,  $\text{mol}\cdot\text{m}^{-3}$ ; and  $L$  is the length of the membrane tube, m.

## 1.2 Inside the membrane pores (wetting)

In general, a ceramic membrane is asymmetric and composed of a support layer and a membrane layer. The two layers have different pore sizes and thicknesses, resulting in different diffusion coefficients. The mass transfer of  $\text{SO}_2$  in the nonwetted membrane pores can be considered to be diffusion without convection. The hydrophilic membrane pores are filled with a NaOH solution as compared to the hydrophobic membrane. Therefore,  $\text{SO}_2$  will react with NaOH in the membrane pores. The continuity equations of  $\text{SO}_2$  diffusion through the support layer and the membrane layer are presented as follows:

$$D_{\text{SO}_2\text{-Membrane}} \left[ \frac{\partial^2 c_{\text{SO}_2\text{-Membrane}}}{\partial r^2} + \frac{1}{r} \frac{\partial c_{\text{SO}_2\text{-Membrane}}}{\partial r} + \frac{\partial^2 c_{\text{SO}_2\text{-Membrane}}}{\partial z^2} \right] + R_{\text{SO}_2} = 0 \quad (5)$$

where  $D_{\text{SO}_2\text{-Membrane}}$  is the diffusion coefficient of  $\text{SO}_2$  in the membrane layer,  $\text{m}^2\cdot\text{s}^{-1}$ .

For the wetted membrane, the mass transfer coefficient of the support and membrane layer is determined by the pore structure of the membrane, including the porosity and the tortuosity of the membrane, and the diffusion in membrane pores.

$$D_{\text{SO}_2\text{-Membrane}} = \frac{D_{\text{SO}_2\text{-Water}} \varepsilon}{\tau} \quad (6)$$

where  $D_{\text{SO}_2\text{-Water}}$  is the diffusion coefficient of  $\text{SO}_2$  in water,  $2\times 10^{-9} \text{m}^2\cdot\text{s}^{-1}$  at  $20^\circ\text{C}$ ,  $\varepsilon$  is the porosity of the ceramic membrane tube and  $\tau$  is the tortuosity of the membrane.

The hydroxide ion ( $\text{OH}^-$ ), as another reactant, also diffuses in the membrane layer and reacts with  $\text{SO}_2$  to reach a steady state process. Therefore, its mass transfer equation

can be presented as follows:

$$D_{\text{OH}^- \text{-Membrane}} \left[ \frac{\partial^2 c_{\text{OH}^- \text{-Membrane}}}{\partial r^2} + \frac{1}{r} \frac{\partial c_{\text{OH}^- \text{-Membrane}}}{\partial r} + \frac{\partial^2 c_{\text{OH}^- \text{-Membrane}}}{\partial z^2} \right] + R_{\text{OH}^-} = 0 \quad (7)$$

where  $D_{\text{OH}^- \text{-Membrane}}$  is the diffusion coefficient of  $\text{OH}^-$  in the membrane layer,  $\text{m}^2 \cdot \text{s}^{-1}$

and it can be calculated as follows:

$$D_{\text{OH}^- \text{-Membrane}} = \frac{D_{\text{OH}^- \text{-Water}} \varepsilon}{\tau} \quad (8)$$

where  $D_{\text{OH}^- \text{-Water}}$  is the diffusion coefficient of  $\text{OH}^-$  in water,  $5.25 \times 10^{-9} \text{m}^2 \cdot \text{s}^{-1}$  at  $20^\circ\text{C}$

The boundary conditions of the mass transfer equations are presented as follows:

$$z = 0 \text{ or } L, \quad \frac{\partial c_{\text{SO}_2 \text{-Membrane}}}{\partial z} = 0 \quad (9a)$$

$$r = r_{\text{in}}, \quad c_{\text{SO}_2 \text{-Membrane}} = c_{\text{SO}_2 \text{-Tube}} \quad (9b)$$

$$c_{\text{OH}^- \text{-Membrane}} = c_{\text{OH}^- \text{-Tube}}$$

$$r = r_{\text{out}}, \quad c_{\text{SO}_2 \text{-Membrane}} = m c_{\text{SO}_2 \text{-Shell}} \quad (9c)$$

$$\frac{\partial c_{\text{OH}^- \text{-Membrane}}}{\partial r} = 0$$

where  $m$  is the phase equilibrium constant of  $\text{SO}_2$  in  $\text{NaOH}$  solution, and  $r_{\text{in}}$  is the inner radius of the ceramic membrane tube, m.

When a chemical reaction occurs, the absorption process will be greatly enhanced. The phase equilibrium constant which chemical absorption occurs can be calculated by the chemical absorption enhancement factor  $E$ .

$$m = \frac{m_{\text{SO}_2 \text{-H}_2\text{O}}}{E} \quad (10)$$

$$E = \frac{J_{\text{chem}}}{J_{\text{phy}}} = Ha^* = \frac{\sqrt{k_E D_{\text{SO}_2 \text{-Membrane}} c_{\text{SO}_2 \text{-Interface}}^A c_{\text{OH}^- \text{-Interface}}^{1-A}}}{k_L} \quad (11)$$

where  $k_L$  is liquid phase mass transfer coefficient,  $D_{\text{SO}_2 \text{-Membrane}}$  is the diffusion coefficient of  $\text{SO}_2$  in membrane,  $c_{\text{SO}_2 \text{-Interface}}$  and  $c_{\text{OH}^- \text{-Interface}}$  are the concentrations of

SO<sub>2</sub> and OH<sup>-</sup> at the gas-liquid interface, respectively. It is assumed that the reaction of SO<sub>2</sub> with OH<sup>-</sup> is as follows,

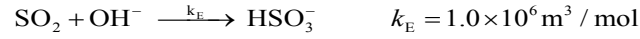

where  $k_E$  is a reaction constant. Therefore, the consumption of SO<sub>2</sub> and OH<sup>-</sup> is equal.

The concentration of OH<sup>-</sup> at the interface can be calculated as follows:

$$N_{\text{OH}^-} = k_L (c_{\text{OH}^- \text{-Liquid}} - c_{\text{OH}^- \text{-Interface}}) \quad (12)$$

Since the membrane is filled with liquid, there is no Knudsen diffusion in the pores of the membrane. The thickness of the membrane layer is much larger than the thickness of the liquid phase boundary layer, so it can be considered that  $k_L$  can be expressed as<sup>4</sup>:

$$k_L = \frac{D_{\text{OH}^- \text{-Liquid}} \varphi}{\tau l_{\text{Membrane}}} \quad (13)$$

where  $D_{\text{OH}^- \text{-Liquid}}$  is the diffusion coefficient of OH<sup>-</sup> in liquid,  $5.25 \times 10^{-9} \text{ m}^2/\text{s}$  at 293.15 K and 1 atm<sup>31</sup>,  $\varphi$  is the porosity,  $\tau$  is the tortuous factor and  $l_{\text{Membrane}}$  is the thickness of the membrane.

Similarly, the concentration of SO<sub>2</sub> at the interface can be calculated as the following equation:

$$N_{\text{SO}_2} = -D_{\text{SO}_2} \frac{c_{\text{SO}_2 \text{-Gas}} - c_{\text{SO}_2 \text{-Interface}}}{\delta_{\text{Gas}}} = k_g (c_{\text{SO}_2 \text{-Gas}} - c_{\text{SO}_2 \text{-Interface}}) \quad (14)$$

where  $k_g$  is gas phase mass transfer coefficient. In membrane contactors, the Sherwood number is usually related to the Reynolds number(Re) and the Schmidt number(Sc). When the gas and the liquid flow in a laminar flow(Re<1000) in a circular straight tube, it can be written as follows<sup>32-34</sup>:

$$Sh = \frac{k_g L}{D_{\text{SO}_2 \text{-Gas}}} = B Re^C Sc^{0.33} \quad (15)$$

Where  $L$  is the length of membrane tube  $D_{\text{SO}_2\text{-Gas}}$  is the diffusion coefficient of  $\text{SO}_2$  in  $\text{N}_2$ ,  $1.23 \times 10^{-5} \text{ m}^2/\text{s}$  at  $293.15 \text{ K}$  and  $1 \text{ atm}^{35}$ ,  $B$  and  $C$  are constant. These parameters depend on the configuration of the membrane contactor and the velocity of the gas.

### 1.3 Tube

The dilution of  $\text{SO}_2$  and  $\text{OH}^-$  in water follows Fick's law. Therefore, the continuity equation of  $\text{SO}_2$  and  $\text{OH}^-$  transport at the tube side under steady-state conditions can be expressed as:

$$R_{\text{SO}_2} + D_{\text{SO}_2\text{-Water}} \left[ \frac{\partial^2 c_{\text{SO}_2\text{-Tube}}}{\partial r^2} + \frac{1}{r} \frac{\partial c_{\text{SO}_2\text{-Tube}}}{\partial r} + \frac{\partial^2 c_{\text{SO}_2\text{-Tube}}}{\partial z^2} \right] - U_{\text{Tube}} \frac{\partial c_{\text{SO}_2\text{-Tube}}}{\partial z} = 0 \quad (16)$$

$$R_{\text{OH}^-} + D_{\text{OH}^-\text{-Water}} \left[ \frac{\partial^2 c_{\text{OH}^-\text{-Tube}}}{\partial r^2} + \frac{1}{r} \frac{\partial c_{\text{OH}^-\text{-Tube}}}{\partial r} + \frac{\partial^2 c_{\text{OH}^-\text{-Tube}}}{\partial z^2} \right] - U_{\text{Tube}} \frac{\partial c_{\text{OH}^-\text{-Tube}}}{\partial z} = 0 \quad (17)$$

For laminar flow, the axial flow velocity distribution in the liquid phase is:

$$U_{\text{Tube}}(r) = 2U_{\text{ave-Tube}} \left[ 1 - \left( \frac{r}{r_{\text{in}}} \right)^2 \right] \quad (18)$$

where the average flow rate of liquid at the tube side ( $U_{\text{ave-Tube}}$ ,  $\text{m} \cdot \text{s}^{-1}$ ) can be calculated according to the following equation:

$$U_{\text{ave-Tube}} = \frac{Q_L}{\pi r_{\text{in}}^2} \quad (19)$$

where  $Q_L$  is the liquid volume flow,  $\text{m}^3 \cdot \text{s}^{-1}$ .

The boundary conditions of the mass transfer equations are presented as follows:

$$r = 0, \quad \frac{\partial c_{\text{SO}_2\text{-Tube}}}{\partial r} = 0, \quad (\text{symmetry}) \quad (20a)$$

$$\frac{\partial c_{\text{OH}^-\text{-Tube}}}{\partial r} = 0$$

$$r=r_{in}, \quad c_{\text{SO}_2\text{-Tube}}=c_{\text{SO}_2\text{-Membrane}} \quad (20b)$$

$$c_{\text{OH}^-\text{-Tube}}=c_{\text{OH}^-\text{-Membrane}}$$

$$z=0, \quad c_{\text{SO}_2\text{-Tube}}=0 \quad (20c)$$

$$c_{\text{OH}^-\text{-Tube}}=0$$

## 2 Reaction equation

The reaction of SO<sub>2</sub> with OH<sup>-</sup> is assumed to occur as follows,

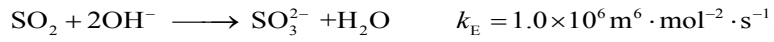

Where  $k_E$  is the reaction rate constant.

## 3 Numerical solution

The proposed dimensionless model equations for the shell, membrane and tube sides of the contactor were solved by COMSOL software with a built-in solver and the finite element method (FEM) for numerical solutions of differential equations. Figure 4a and Figure 4b show the simulation results of SO<sub>2</sub> concentration distributions in the membrane contactor in axial and radial directions, respectively, for a MGA test. The SO<sub>2</sub> flux and SO<sub>2</sub> removal efficiency for various membrane properties and operational conditions can be calculated based on the SO<sub>2</sub> concentration variations in the gas and liquid phases.
